# Interactions between seasonal human coronaviruses and implications for the SARS-CoV-2 pandemic: A retrospective study in Stockholm, Sweden, 2009-2020

Robert Dyrdak<sup>1, 2</sup> Emma B. Hodcroft<sup>3, 4</sup> Martina Wahlund<sup>1, 5</sup> Richard A. Neher<sup>3, 4</sup> and Jan Albert<sup>1, 2</sup>

*1 Department of Clinical Microbiology, Karolinska University Hospital, Stockholm, Sweden*

*2 Department of Microbiology, Tumor and Cell Biology, Karolinska Institutet, Stockholm, Sweden*

*3 Biozentrum, University of Basel, Basel, Switzerland*

*4 Swiss Institute of Bioinformatics, Basel, Switzerland*

*5 Department of Medicine, Infectious Diseases Unit, Center for Molecular Medicine, Karolinska Institutet, Stockholm, Sweden*

## 1 Abstract

### 2 Objectives

3 The four seasonal coronaviruses 229E, NL63, OC43, and HKU1 are frequent causes of respiratory infections and  
4 show annual and seasonal variation. Increased understanding about these patterns could be informative about  
5 the epidemiology of SARS-CoV-2.

### 6 Methods

7 Results from PCR diagnostics for the seasonal coronaviruses, and other respiratory viruses, were obtained for  
8 55,190 clinical samples analysed at the Karolinska University Hospital, Stockholm, Sweden, between 14  
9 September 2009 and 2 April 2020.

### 10 Results

11 Seasonal coronaviruses were detected in 2,130 samples (3.9%) and constituted 8.1% of all virus detections.  
12 OC43 was most commonly detected (28.4% of detections), followed by NL63 (24.0%), HKU1 (17.6%), and 229E  
13 (15.3%). The overall fraction of positive samples was similar between seasons, but at species level there were  
14 distinct biennial alternating peak seasons for the *Alphacoronaviruses*, 229E and NL63, and the  
15 *Betacoronaviruses*, OC43 and HKU1, respectively. The *Betacoronaviruses* peaked earlier in the winter season  
16 (Dec-Jan) than the *Alphacoronaviruses* (Feb-Mar). Coronaviruses were detected across all ages, but diagnostics  
17 were more frequently requested for paediatric patients than adults and the elderly. OC43 and 229E incidence  
18 was relatively constant across age strata, while that of NL63 and HKU1 decreased with age.

### 19 Conclusions

20 Both the *Alphacoronaviruses* and *Betacoronaviruses* showed alternating biennial winter incidence peaks, which  
21 suggests some type of immune mediated interaction. Symptomatic reinfections in adults and the elderly  
22 appear relatively common. Both findings may be of relevance for the epidemiology of SARS-CoV-2.

**NOTE: This preprint reports new research that has not been certified by peer review and should not be used to guide clinical practice.**

## 23 Introduction

24 The world is seeing a pandemic by a new coronavirus, SARS-CoV-2, which is the cause of the disease COVID-19.  
25 The pandemic has unprecedented effects on societies globally. Although SARS-CoV-2 is new to mankind, six  
26 other coronaviruses are known to infect humans. This includes the four “seasonal” coronaviruses (CoVs): 229E,  
27 NL63, OC43 and HKU1, which are found globally and in immunocompetent hosts usually cause mild to  
28 moderate upper-respiratory tract disease [1-5]. In contrast, infections with two other coronaviruses, SARS-CoV  
29 and MERS-CoV, have severe clinical presentation and substantial mortality [6]. The human coronaviruses are  
30 found in two genera of the subfamily orthocoronavirinae. The genus *Alphacoronavirus* includes 229E and NL63,  
31 whereas the genus *Betacoronavirus* includes OC43 and HKU1 (subgenus Embecovirus), SARS-CoV and SARS-  
32 CoV-2 (subgenus Sarbecovirus), and MERS-CoV (subgenus Merbecovirus) [7].  
33 Here we use results from routine clinical diagnostic tests on approximately 55,000 patient samples to analyze  
34 the epidemiology of the seasonal CoVs in Stockholm, Sweden. Better knowledge about the epidemiology of the  
35 seasonal CoVs could potentially inform about the epidemiology of SARS-CoV-2.

## 36 Methods

### 37 Samples and metadata

38 Data from routine diagnostics were obtained from the laboratory information system at the Department of  
39 Clinical Microbiology, Karolinska University Hospital, Stockholm, Sweden. The majority of samples analyzed  
40 were obtained from the Stockholm Region (2.2 million inhabitants), where the laboratory provides diagnostic  
41 services to six of seven major hospitals, and outpatient care to approximately to half of the population. PCR  
42 diagnostics for the seasonal CoVs were performed using accredited in-house assays [8] or the Allplex  
43 Respiratory Panels 2 and 3 (Seegene Inc., Seoul (South Korea)), see supplement for details on virus diagnostics.  
44 The associated metadata contained the laboratory results, date of sample collection, specimen type, age and  
45 sex of the patient. The study was reviewed and approved by the Swedish Ethical Review Authority (registration  
46 no. 2020-03001).

## 47 Statistical analyses

48 Statistical analyses were performed using Stata version 15.1 (StataCorp LLC, College Station (TX, USA)). Point  
49 estimates and 95% confidence intervals (CIs) of proportions and odds ratios (ORs) were calculated using logistic  
50 regression with 200 bootstrap replications. To avoid selection bias, odds ratio for co-detections were calculated  
51 across the subset of samples with complete records and at least detection of one respiratory pathogen [9].

## 52 Results

### 53 Basic characteristics of samples and results from CoVs diagnostics

54 During 14 September 2009 until 2 April 2020, a total of 135,922 samples were obtained for respiratory virus  
55 diagnostics. Of these, 55,190 samples had been analyzed for an extended virus panel which included the four  
56 seasonal CoVs. There were 2153 detections of seasonal CoVs in 2,130 of the 55,190 samples (3.9%; 95% CI:  
57 3.7%-4.0%), representing 8.1% (95% CI: 7.7%-8.4%) of all virus detections. The annual number of CoV-positive  
58 samples increased over the study period as a result of increased testing, but the fraction of positive samples  
59 decreased (Figure 1A and B, respectively). Among the 2,130 CoV-positive samples the most common species  
60 detected was OC43 (28.4%), followed by NL63 (24.0%), HKU1 (17.6%), and 229E (15.3%). In addition, 15.9% of  
61 the CoV-positive samples were positive for OC43/HKU1 in the Allplex assay, which does not distinguish  
62 between the two. In 23 samples (1.1% of all positive samples), two different species of CoVs were detected.  
63 Information about the sex of the patients was available for 55,102 samples (99.8%). CoV-positive results were  
64 significantly more common in men (55.1% of positive samples, 95% CI: 54.7%-55.5%, OR 1.16; 95% CI 1.06-  
65 1.26).

### 66 Alternating biennial incidence and peak incidence month of seasonal CoVs

67 The number of samples analyzed for CoVs (and other respiratory viruses) showed seasonal variation with peaks  
68 in the winters (Figure 1A). The number of CoV positive samples showed even more pronounced winter peaks.  
69 The overall fraction of samples positive for any species did not show any marked season-to-season variation  
70 across the duration of the study (Figure 1B). This is in stark contrast to the incidence of detection of the four  
71 CoV species, which all showed distinct biennial patterns (Figure 2). Interestingly, a pattern of alternating peak  
72 seasons was observed for the two *Alphacoronaviruses*, 229E and NL63. This pattern was even more striking for

73 the two *Betacoronaviruses*, OC43 and HKU1. Due to the biennial alternating patterns, 229E and HKU1 had peak  
74 incidence in winter seasons starting in odd number years (2009/2010, 2011/2012, etc), whereas NL63 and  
75 OC43 peaked in seasons starting in even number years (2010/2011, 2012/2013, etc).

76 Next, we investigated the variation of CoV detections over the calendar year by averaging over the entire study  
77 period. When all four species were combined, the lowest activity was observed from July to October. There  
78 was a steep increase in CoV detections in November, and a peak in December. However, the peaks for the  
79 individual species occurred in different months (Figure 3).

80 In summary, there were two patterns in the incidence of the four species of seasonal CoVs appeared to show  
81 two different types of interactions. Firstly, both the two *Alphacoronaviruses* (229E and NL63) and the two  
82 *Betacoronaviruses* (OC43 and HKU1) peaked in alternating seasons. Secondly, the *Betacoronaviruses* peaked  
83 earlier in the winter season than the *Alphacoronaviruses*.

## 84 Infections with seasonal CoV across age strata

85 Information about the age of patients with CoV-positive results was available for 55,063 (99.8%) samples. For  
86 age strata with patients younger than 20 years, more than 60% of samples had been analyzed with the  
87 extended respiratory virus panel, which included the seasonal CoVs. In contrast, less than 40% of samples were  
88 tested for CoVs in all the older age strata, and in particular the oldest patients ( $\geq 90$  years) (Figure 4A). The  
89 fraction of samples positive for any CoV was highest in the two youngest age strata and was the lowest in the  
90 age stratum 80-89 years; however, it is important to note that CoV infections were diagnosed in all age strata  
91 (Figure 4A). The fractions of positive samples in the different age strata also showed some variation over  
92 seasons (supplement figures S1 and S2). We separately investigated the age distributions of each of four CoV  
93 species (Figure 4B-E, and supplement figures S1, S2). NL63 and HKU1 showed a tendency to decline with age,  
94 while detection of 229E and OC43 was more similar across the age strata.

## 95 Co-detection of CoVs with other respiratory viruses

96 Of 2,130 samples positive for any CoV, matched results for analyses of the full panel of other respiratory  
97 viruses were obtained for 1,953 samples. At least one additional respiratory virus was identified in 737 samples  
98 (34.6%, 95% CI: 32.6-36.7%), and two or more other respiratory viruses were identified in 128 samples (6.0%,  
99 95% CI: 5.0-7.1%). Co-detections were most common in the two youngest age strata (0-1 and 2-5 years),

100 accounting for 76.1% of samples positive for CoV and a co-detected virus. The four viruses that were most  
101 commonly co-detected with CoVs were: RSV (9.2%), RV (7.2%), BoV (6.8%) and AdV (4.7%) (Figure S3); the co-  
102 detections appeared less common than expected by chance. Thus, the odds ratio was significantly reduced for  
103 co-detection of CoVs with RSV (0.56, 95% CI 0.47 to 0.66) and AdV (0.52, 95% CI 0.42 to 0.66), and non-  
104 significantly reduced for RV 0.83 (95% CI 0.62 to 1.12) and BoV 0.95 (95% CI 0.79 to 1.15). However, more than  
105 half (59.4%) of the samples were submitted for analysis IAV, IBV, and RSV only. In these samples, IAV was  
106 detected in 14.6% of samples, compared to detection of IAV in 4.6% of samples with request for the extended  
107 respiratory virus panel. Thus, co-detection of the seasonal CoVs with RSV and the influenza viruses might be  
108 underrepresented in this material due to selection bias.

## 109 Discussion

110 In this study we comprehensively have investigated the epidemiology of the four seasonal coronaviruses (229E,  
111 NL63, OC43, and HKU1) using PCR results from more than 55,000 clinical samples analyzed 2009–2020 in  
112 Stockholm, Sweden. We found that CoV infections were detected in around 4% of samples, but due to  
113 considerable seasonal variation the proportion positive samples varied from <1% in Aug–Sept, to close to 8% in  
114 Dec–Jan. All four seasonal CoVs showed biennial winter incidence peaks, with alternating peak seasons for the  
115 two *Alphacoronaviruses*, 229E and NL63, and the two *Betacoronaviruses*, OC43 and HKU1, respectively. This  
116 novel finding suggests some type of immunological interaction or interference. The fraction of CoV-positive  
117 samples was the highest among children aged 0-5 years, but infections occurred in all age strata, which  
118 suggests that symptomatic reinfections among adults and the elderly are not uncommon. Our results  
119 concerning the epidemiology of seasonal CoVs have implications for the likely future endemic presence of  
120 SARS-CoV-2 and extend the knowledge gained by earlier studies [9-11].

121 We report that the four species of seasonal CoVs appeared to show two different types of interactions. Firstly,  
122 both the *Alphacoronaviruses* (229E and NL63) and the *Betacoronaviruses* (OC43 and HKU1), respectively,  
123 peaked in alternating winter seasons. Secondly, the circulation of the *Betacoronaviruses* peaked earlier in the  
124 winter season than that of the *Alphacoronaviruses*. The biennial pattern of the seasonal CoVs that we report is  
125 in line with earlier reports from the temperate zone of the Northern Hemisphere [1, 4, 11-13]. Importantly,  
126 these studies also found that *Alphacoronaviruses* and *Betacoronaviruses*, respectively, tended to peak in

127 alternating seasons, matching our findings. However, only Kissler *et al.* [11] and Nickbakhsh *et al.* [9] make a  
128 point of this finding and draw inference about possible immunological interactions and their implications for  
129 the future of SARS-CoV-2, but the studies did not include *Alphacoronaviruses* or HKU1, respectively. Thus, we  
130 extend their findings by showing that the both genera show similar interactions, which indicates that this is a  
131 general property of CoVs. Furthermore, it is reassuring that the biennial alternating pattern is found in different  
132 continents and countries in the temperate zone of the Northern Hemisphere, as this indicates that the  
133 interactions are not a local phenomenon in our study setting in Stockholm, Sweden. It should be noted that the  
134 effect may be limited to the temperate zone as biennial seasonality is not noted in a study from southern China  
135 [2].

136 The alternating biennial cycles of the two *Alphacoronaviruses* and the two *Betacoronaviruses* warrants further  
137 investigation. It could be a chance event, but more likely is due to some type of anti-phase synchronization  
138 [31], which could be generated even by weak cross-immunity. With regard to immunity, although IgG  
139 antibodies against CoVs are present in almost all adult individuals [14], early studies showed that CoV  
140 infections commonly occur despite a prior presence of neutralizing antibodies [13, 15, 16]. Moreover, a  
141 substantial number of reinfections of NL63 were detected in a recent study with repeated sampling over a  
142 season in community setting [17]. Indications of frequent reinfections with all four seasonal coronaviruses  
143 were also provided by a recent serological study from the Netherlands [18], as did our study, with infections  
144 occurring in all age groups. Immunologic interaction between the seasonal CoVs has been suggested as a cause  
145 of the dominance of NL63 and OC43 in infants [19].

146 The prevalence of seasonal CoV infection worldwide and possibility of immunological interference by seasonal  
147 CoVs with each other has raised hopes of potential protective effects against SARS-CoV-2-infection or  
148 modulation of COVID-19 disease [20]. However, despite the presence of cross-reactive binding antibodies  
149 between SARS-CoV and SARS-CoV-2, cross-neutralization appears to be rare [21], even though these viruses are  
150 relatively closely related. All of these findings are interesting in the context of the SARS-CoV-2 pandemic,  
151 because T-cells reactive to SARS-CoV-2 have been detected in samples from donors sampled before the  
152 pandemic [22, 23], as well as in seronegative exposed persons [24]. This could possibly be due to cross-  
153 immunity between the seasonal CoVs and SARS-CoV-2 [9, 11].

154 As we find a higher prevalence of seasonal CoV infections in younger age groups, recent seasonal CoV infection  
155 and some level of cross-reactive immunity with SARS-CoV-2 might at least partially explain the apparently  
156 lower attack rate of SARS-CoV-2 in young children compared to older persons [25, 26]. At the same time,  
157 reinfection by seasonal CoVs clearly occurs throughout life and any potential cross-protection might be short-  
158 lived [18], implying that the magnitude of the cross-protective effect might be small.

159 We found that OC43 was the species that was most commonly detected, which is in line with earlier studies [1-  
160 4, 9, 12, 27, 28]. The odds ratio for positive samples in our study was significantly lower for females than males.  
161 This gender difference is interesting in relation to COVID-19, as male patients have a higher risk of severe  
162 disease and death than females [29, 30]. We noted CoV infections across all age strata, although the highest  
163 prevalence was observed among children. Collectively, our results indicate that symptomatic CoV reinfections  
164 among adults and elderly are not uncommon, though we did not formally exclude the possibility that they had  
165 primary CoV infections through serological testing.

166 Our study has some limitations. In particular, it is a retrospective study that utilizes results from routine clinical  
167 diagnostics. It is difficult to exclude that there have been changes in the strategies and prioritization for  
168 diagnostics of respiratory infections over the study period. For example, there have been some changes in the  
169 platforms used for virus diagnostics during the study period that may have modified the sensitivity of CoVs  
170 detection. Also, information about clinical presentation and disease severity were not available. However, all  
171 samples were from clinical diagnostics, which means that the symptoms were severe enough to prompt  
172 sampling. Another limitation is that more than half of the adults were tested only for IAV, IBV, and RSV, and not  
173 the full virus panel. It is likely that CoV infections have been underdiagnosed among the adults and the elderly  
174 because they were not tested for. The main strengths of the study are the large sample size and the long study  
175 period.

176 To conclude, the notable yearly alternation within genera, and the temporal spacing in peaks between genera,  
177 suggest a possible immunological interaction or interference. We further identify a distinct difference in the  
178 timing of the seasonal peaks, with the *Alphacoronaviruses* peaking months after the Dec-Jan peak observed for  
179 the *Betacoronaviruses*. Our findings have implications both for better understanding seasonality and  
180 interaction in coronaviruses generally and for the likely future endemic presence of SARS-CoV-2, and thus merit  
181 further immunological studies.

## 182 Acknowledgements

183 We thank Berit Hammas, MD, at the Department of Clinical Microbiology, Karolinska University Hospital, for  
184 valuable input on the virus diagnostics.

## 185 Transparency declaration

186 The authors declare no conflicts of interest.

## 187 Authors' contribution

188 Concept and design: RD, EBH, RAN, JA.

189 Analysis and interpretation of data: RD, EBH, MW, RAN, JA. RD, MW, and JA accessed the underlying data.

190 Drafting of the manuscript: RD, JA.

191 Critical revision of the manuscript for important intellectual content: RD, EBH, MW, RAN, JA.

192 All authors finally approved the version to be submitted.

## 193 References

1. Gaunt ER, Hardie A, Claas EC, Simmonds P, Templeton KE. Epidemiology and clinical presentations of the four human coronaviruses 229E, HKU1, NL63, and OC43 detected over 3 years using a novel multiplex real-time PCR method. *J Clin Microbiol*. 2010;48(8):2940-7.
2. Zeng ZQ, Chen DH, Tan WP, Qiu SY, Xu D, Liang HX, et al. Epidemiology and clinical characteristics of human coronaviruses OC43, 229E, NL63, and HKU1: a study of hospitalized children with acute respiratory tract infection in Guangzhou, China. *Eur J Clin Microbiol Infect Dis*. 2018;37(2):363-9.
3. Nickbakhsh S, Thorburn F, Von Wissmann B, McMenemy J, Gunson R, Murcia P. Extensive multiplex PCR diagnostics reveal new insights into the epidemiology of viral respiratory infections. *Epidemiol Infect*. 2016;144(10):2064-76.
4. Heimdal I, Moe N, Krokstad S, Christensen A, Skanke LH, Nordbø SA, et al. Human coronavirus in hospitalized children with respiratory tract infections: a 9-year population-based study from Norway. *The Journal of infectious diseases*. 2019;219(8):1198-206.
5. Hendley JO, Fishburne HB, Gwaltney JM, Jr. Coronavirus infections in working adults. Eight-year study with 229 E and OC 43. *Am Rev Respir Dis*. 1972;105(5):805-11.
6. Su S, Wong G, Shi W, Liu J, Lai AC, Zhou J, et al. Epidemiology, genetic recombination, and pathogenesis of coronaviruses. *Trends Microbiol*. 2016;24(6):490-502.
7. of the International CSG. The species Severe acute respiratory syndrome-related coronavirus: classifying 2019-nCoV and naming it SARS-CoV-2. *Nature microbiology*. 2020;5(4):536.



8. Tiveljung-Lindell A, Rotzén-Östlund M, Gupta S, Ullstrand R, Grillner L, Zwegberg-Wirgart B, et al. Development and implementation of a molecular diagnostic platform for daily rapid detection of 15 respiratory viruses. *Journal of medical virology*. 2009;81(1):167-75.
9. Nickbakhsh S, Ho A, Marques DFP, McMenamin J, Gunson RN, Murcia PR. Epidemiology of seasonal coronaviruses: Establishing the context for COVID-19 emergence. *J Infect Dis*. 2020.
10. Neher RA, Dyrda R, Druelle V, Hodcroft EB, Albert J. Potential impact of seasonal forcing on a SARS-CoV-2 pandemic. *Swiss Med Wkly*. 2020;150:w20224.
11. Kissler SM, Tedijanto C, Goldstein E, Grad YH, Lipsitch M. Projecting the transmission dynamics of SARS-CoV-2 through the postpandemic period. *Science*. 2020;368(6493):860-8.
12. Killerby ME, Biggs HM, Haynes A, Dahl RM, Mustaquim D, Gerber SI, et al. Human coronavirus circulation in the United States 2014-2017. *Journal of clinical virology : the official publication of the Pan American Society for Clinical Virology*. 2018;101:52-6.
13. Monto AS, Lim SK. The Tecumseh study of respiratory illness. VI. Frequency of and relationship between outbreaks of coronavirus infection. *J Infect Dis*. 1974;129(3):271-6.
14. Zhou W, Wang W, Wang H, Lu R, Tan W. First infection by all four non-severe acute respiratory syndrome human coronaviruses takes place during childhood. *BMC Infect Dis*. 2013;13(1):433.
15. Hamre D, Beem M. Virologic studies of acute respiratory disease in young adults. V. Coronavirus 229E infections during six years of surveillance. *Am J Epidemiol*. 1972;96(2):94-106.
16. Hendley JO, Fishburne HB, Gwaltney Jr JM. Coronavirus infections in working adults: eight-year study with 229 E and OC 43. *Am Rev Respir Dis*. 1972;105(5):805-11.
17. Kiyuka PK, Agoti CN, Munywoki PK, Njeru R, Bett A, Otieno JR, et al. Human Coronavirus NL63 Molecular Epidemiology and Evolutionary Patterns in Rural Coastal Kenya. *J Infect Dis*. 2018;217(11):1728-39.
18. Edridge AW, Kaczorowska J, Hoste AC, Bakker M, Klein M, Loens K, et al. Seasonal coronavirus protective immunity is short-lasting. *Nat Med*. 2020:1-3.
19. Dijkman R, Jebbink MF, Gaunt E, Rossen JW, Templeton KE, Kuijpers TW, et al. The dominance of human coronavirus OC43 and NL63 infections in infants. *Journal of clinical virology : the official publication of the Pan American Society for Clinical Virology*. 2012;53(2):135-9.
20. Lipsitch M, Grad YH, Sette A, Crotty S. Cross-reactive memory T cells and herd immunity to SARS-CoV-2. *Nature Reviews Immunology*. 2020:1-5.
21. Lv H, Wu NC, Tsang OT-Y, Yuan M, Perera RA, Leung WS, et al. Cross-reactive antibody response between SARS-CoV-2 and SARS-CoV infections. *Cell Rep*. 2020:107725.
22. Grifoni A, Weiskopf D, Ramirez SI, Mateus J, Dan JM, Moderbacher CR, et al. Targets of T cell responses to SARS-CoV-2 coronavirus in humans with COVID-19 disease and unexposed individuals. *Cell*. 2020.
23. Weiskopf D, Schmitz KS, Raadsen MP, Grifoni A, Okba NMA, Endeman H, et al. Phenotype of SARS-CoV-2-specific T-cells in COVID-19 patients with acute respiratory distress syndrome. *medRxiv*. 2020:2020.04.11.20062349.
24. Sekine T, Perez-Potti A, Rivera-Ballesteros O, Strålin K, Gorin J-B, Olsson A, et al. Robust T cell immunity in convalescent individuals with asymptomatic or mild COVID-19. *Cell*. 2020.
25. Stringhini S, Wisniak A, Piumatti G, Azman AS, Lauer SA, Baysson H, et al. Seroprevalence of anti-SARS-CoV-2 IgG antibodies in Geneva, Switzerland (SEROCoV-POP): a population-based study. *The Lancet*. 2020.
26. Gudbjartsson DF, Norddahl GL, Melsted P, Gunnarsdottir K, Holm H, Eythorsson E, et al. Humoral immune response to SARS-CoV-2 in Iceland. *N Engl J Med*. 2020.

27. Monto AS, DeJonge P, Callear AP, Bazzi LA, Capriola S, Malosh RE, et al. Coronavirus occurrence and transmission over 8 years in the HIVE cohort of households in Michigan. *The Journal of infectious diseases*. 2020.
28. Rucinski SL, Thomas AS, Patel R, editors. Seasonality of Coronavirus 229E, HKU1, NL63, and OC43 From 2014 to 2020. *Mayo Clin Proc*; 2020: Mayo Foundation for Medical Education and Research.
29. The Swedish Public Health Agency. Weekly report on COVID-19. 2020.
30. Williamson EJ, Walker AJ, Bhaskaran K, Bacon S, Bates C, Morton CE, et al. Factors associated with COVID-19-related death using OpenSAFELY. *Nature*. 2020;584(7821):430-6.
31. Dillão R. Antiphase and in-phase synchronization of nonlinear oscillators: The Huygens's clocks system. *Chaos*. 2009.

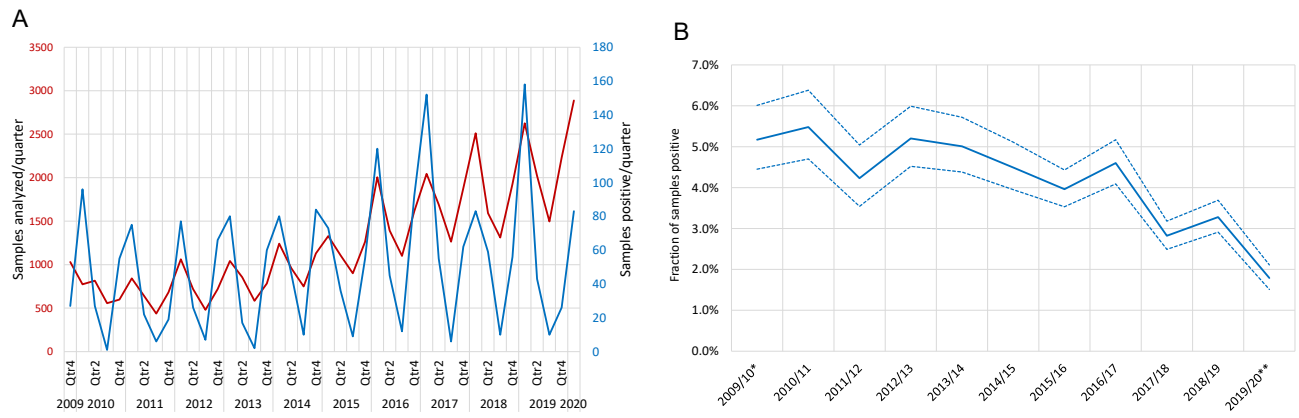

FIG. 1. **Samples positive for coronaviruses.** (A) The number of samples analyzed per quarter from 1 October 2009 to 31 March 2020 (red line,  $n = 55,017$ ), and samples being positive for any of the endemic coronaviruses (blue line,  $n = 2,128$ ). (B) The fraction of samples positive per season for any of the seasonal coronaviruses. \*, from 14 Sept until 31 Dec 2009; \*\*, from 1 Jan until 2 April 2020.

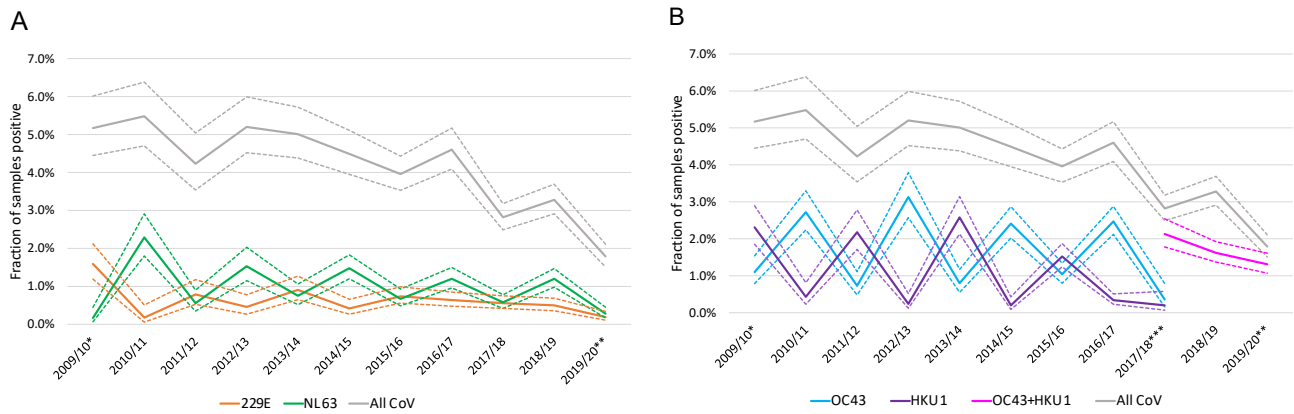

FIG. 2. **Fraction of samples per season being positive for each of the four CoV species.** The fraction of samples positive per season for (A) the *Alphacoronaviruses* (229E, NL63) and (B) the *Betacoronaviruses* (OC43, HKU1). The gray line shows the fraction of samples positive for any of the CoV. Dashed lines mark CI. \*, from 14 Sept until 31 Dec 2009; \*\*, from 1 Jan until 2 April 2020; \*\*\*, from 6 November 2017 until 2 April 2020 OC43 and HKU1 were not analyzed separately.

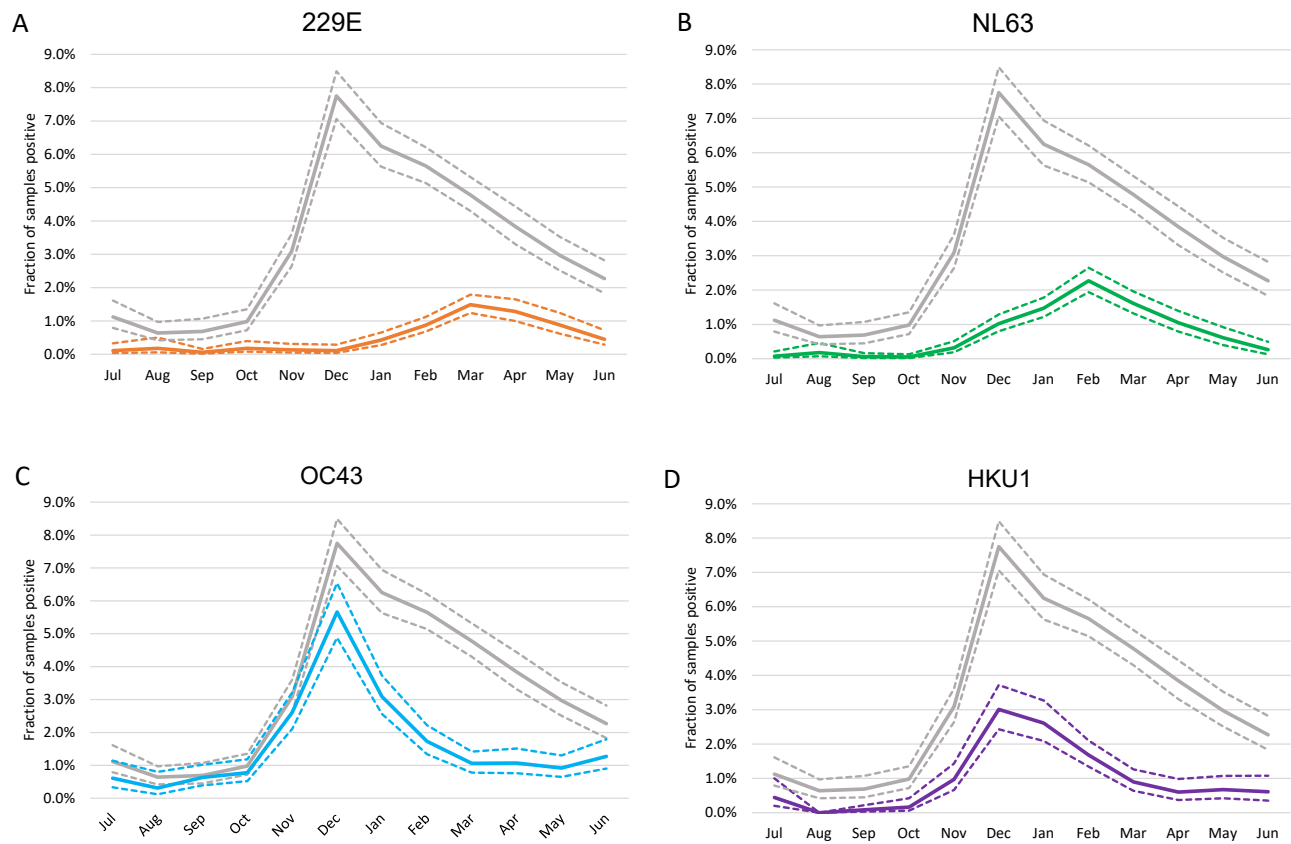

FIG. 3. **Seasonal peak.** The fraction of samples per calendar month being positive for (A) 229E, (B) NL63, (C) OC43, and (D) HKU1. The gray line shows the fraction of samples being positive for any of the CoV. Dashed lines mark CI.

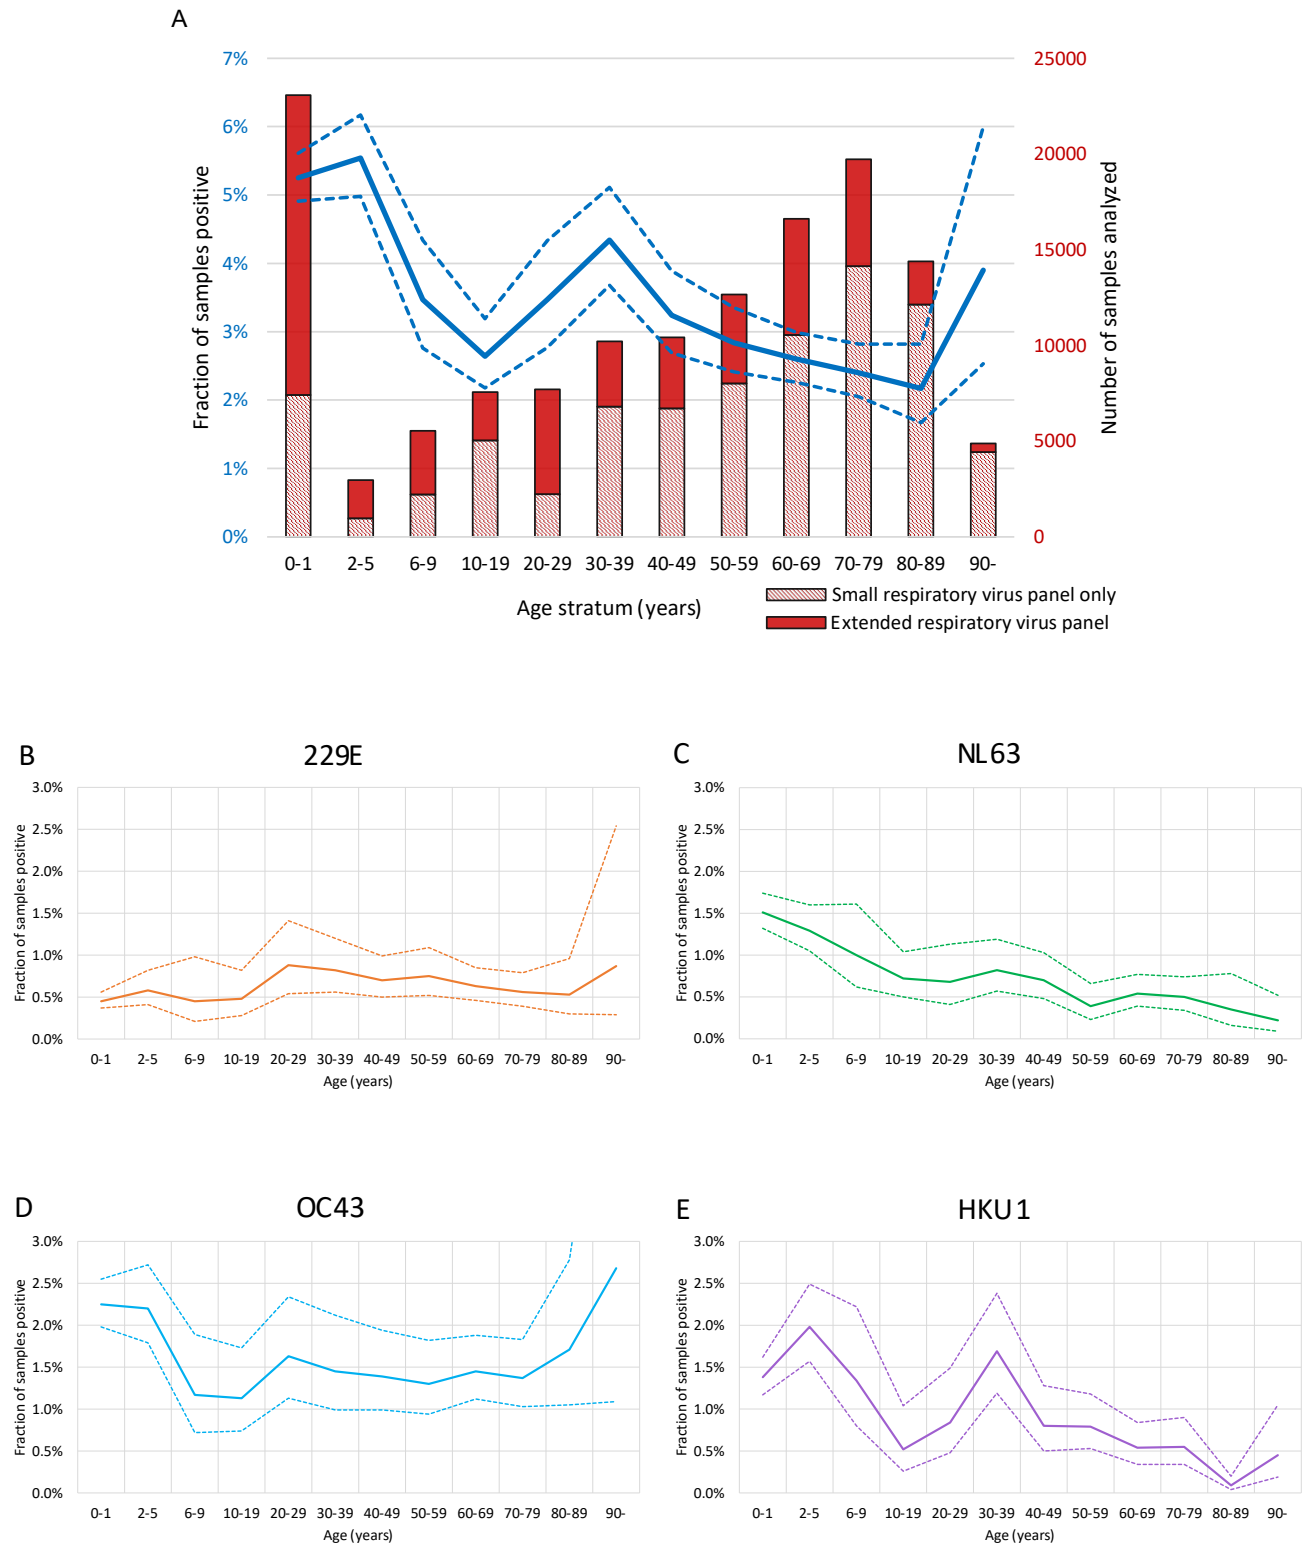

**FIG. 4. Fraction of samples positive for each species of coronavirus per age stratum.** (A) Fraction of samples positive for any of the coronaviruses per age stratum (blue line, dash lines mark 95% CI). Bars show number of submitted samples in total ( $n = 135,922$ ), and fraction analyzed for the extended respiratory panel which includes the analysis for coronaviruses (solid red,  $n = 55,190$ ). Fraction of samples positive per age stratum for (B) 229E, (C) NL63, (D) OC43, and (E) HKU1.
